# Supplementary material for: Distinctive Roles of Two Acinetobactin Isomers in Challenging Host Nutritional Immunity
Source: PubMed Central journal article supplement (PMC8546848; doi:10.1128/mbio.02248-21), 2021-09-14
Supplement: mbio.02248-21-sf002.pdf [file mbio.02248-21-sf002.pdf]

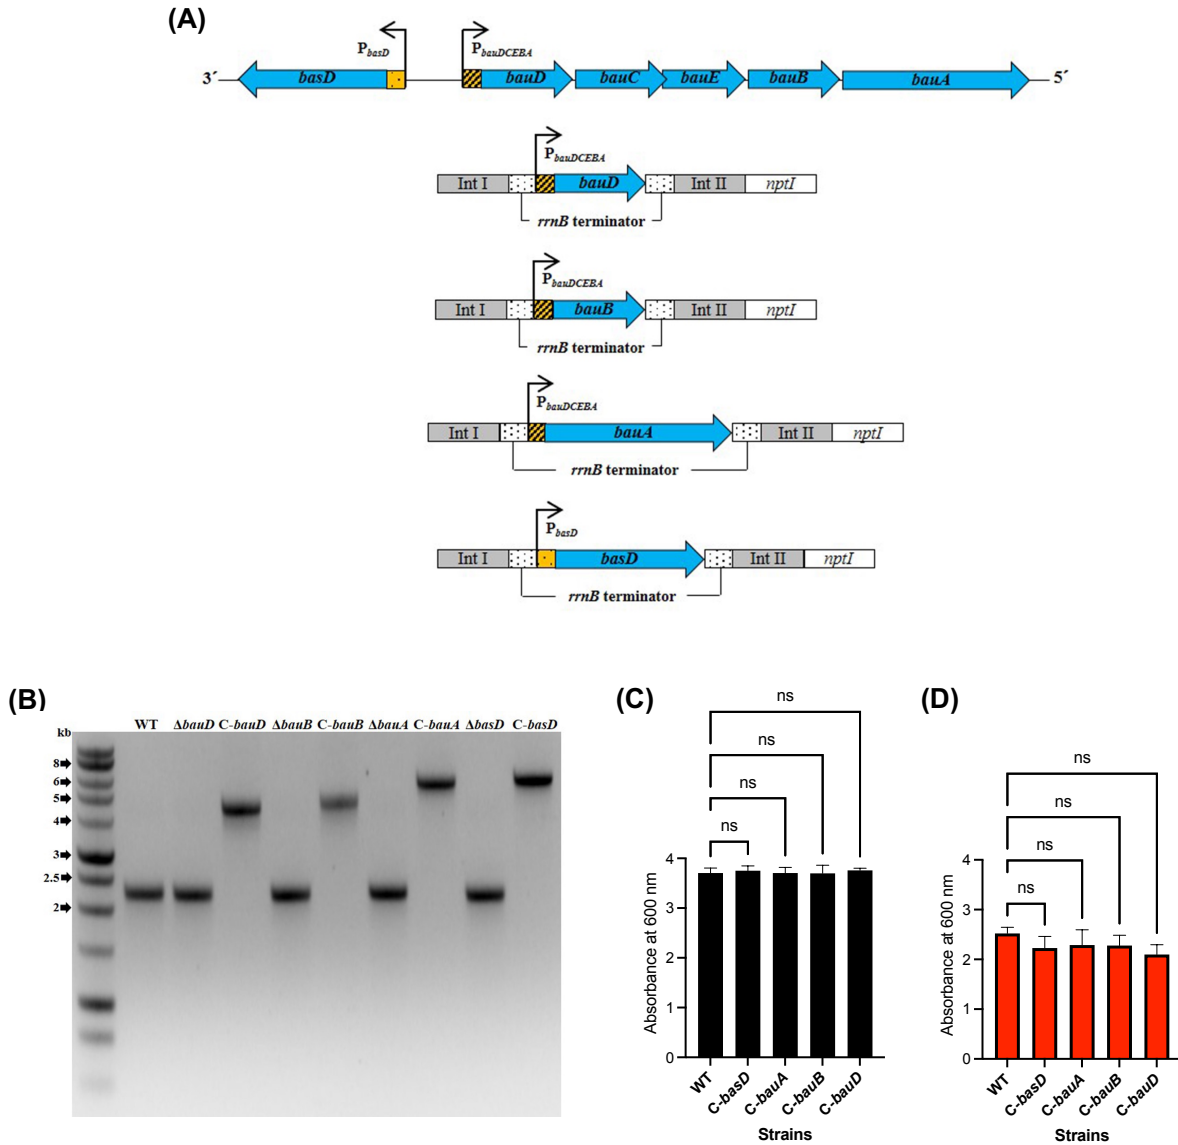

**Fig. S2. Verification of the *A. baumannii* mutant strains.**

(A) Schematic diagram of overlap extension PCR for single copy complementation of the  $\Delta bauD$ ,  $\Delta bauB$ ,  $\Delta bauA$ , and  $\Delta basD$  mutant strains.  $P_{bauDCEBA}$ , promoter of *bauD*, *bauC*, *bauE*, *bauB*, and *bauA*;  $P_{basD}$ , promoter of *basD*; Int I and Int II, intergenic regions located between DJ41\_RS05115 and DJ41\_RS05120. (B) PCR analysis of the genomic DNA of the wild-type (WT), mutants ( $\Delta bauD$ ,  $\Delta bauB$ ,  $\Delta bauA$ , and  $\Delta basD$ ), and the corresponding complemented strains (*C-bauD*, *C-bauB*, *C-bauA*, *C-basD*) using Int01F and Int02R primers. Each of the genomic DNA of wild-type and mutants produced a 2.2-kb amplicon, whereas the PCR using genomic DNA from the  $\Delta bauD$ ,  $\Delta bauB$ ,  $\Delta bauA$ , and  $\Delta basD$  complemented strains resulted in 4.4-kb, 4.5-kb, 5.8-kb, and 6.0-kb amplicons, respectively. Growth of the *A. baumannii* ATCC 19606 WT and complemented mutant strains in the LB medium (C) without or (D) with 200  $\mu$ M DP, confirming no occurrence of the polar effect during each gene disruption. The growth of each bacterial strain was measured using a 1 cm cuvette after 24 h incubation at 37  $^{\circ}$ C. Error bars represent the standard deviations of three independent experiments. Statistical significance was assessed by one-way ANOVA tests (ns: not significant).
