# Supplementary material for: Distinctive Roles of Two Acinetobactin Isomers in Challenging Host Nutritional Immunity
Source: PubMed Central journal article supplement (PMC8546848; doi:10.1128/mbio.02248-21), 2021-09-14
Supplement: mbio.02248-21-sf003.pdf [file mbio.02248-21-sf003.pdf]

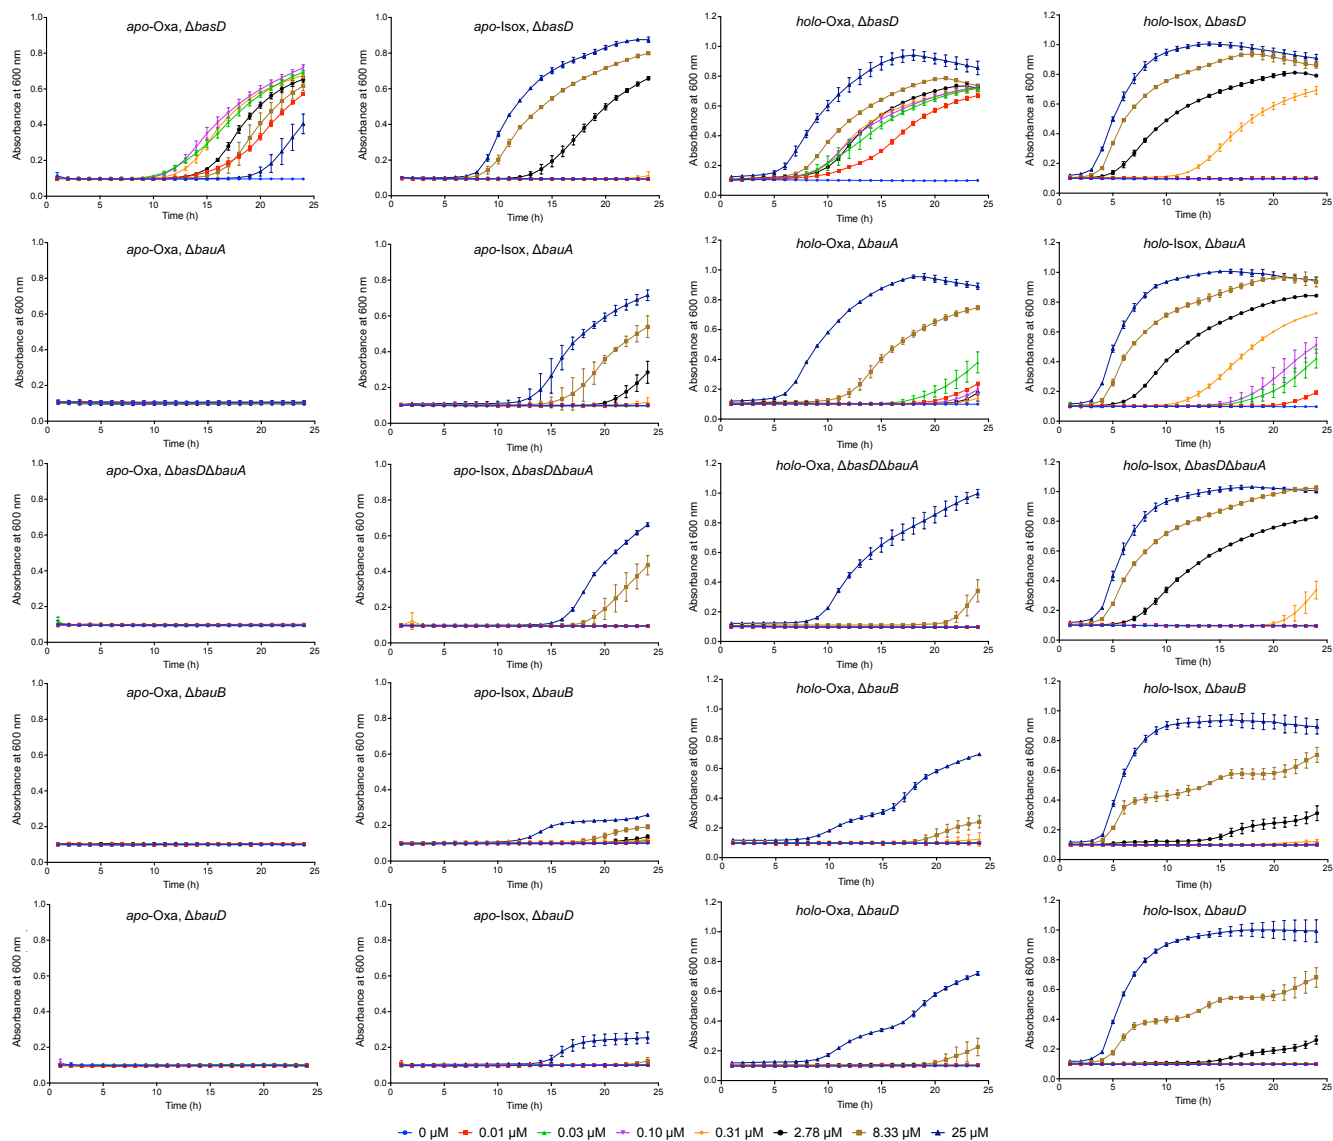

**Fig S3. Growth curves of the *A. baumannii* mutants treated with the indicated form of acinetobactin under iron-deficient conditions (LB medium containing 200  $\mu$ M DP).**

All experiments were conducted using the LB media containing 200  $\mu$ M DP. Error bars represent the standard deviations of independent triplicate experiments.
