# Supplementary material for: Distinctive Roles of Two Acinetobactin Isomers in Challenging Host Nutritional Immunity
Source: PubMed Central journal article supplement (PMC8546848; doi:10.1128/mbio.02248-21), 2021-09-14
Supplement: mbio.02248-21-sf006.pdf [file mbio.02248-21-sf006.pdf]

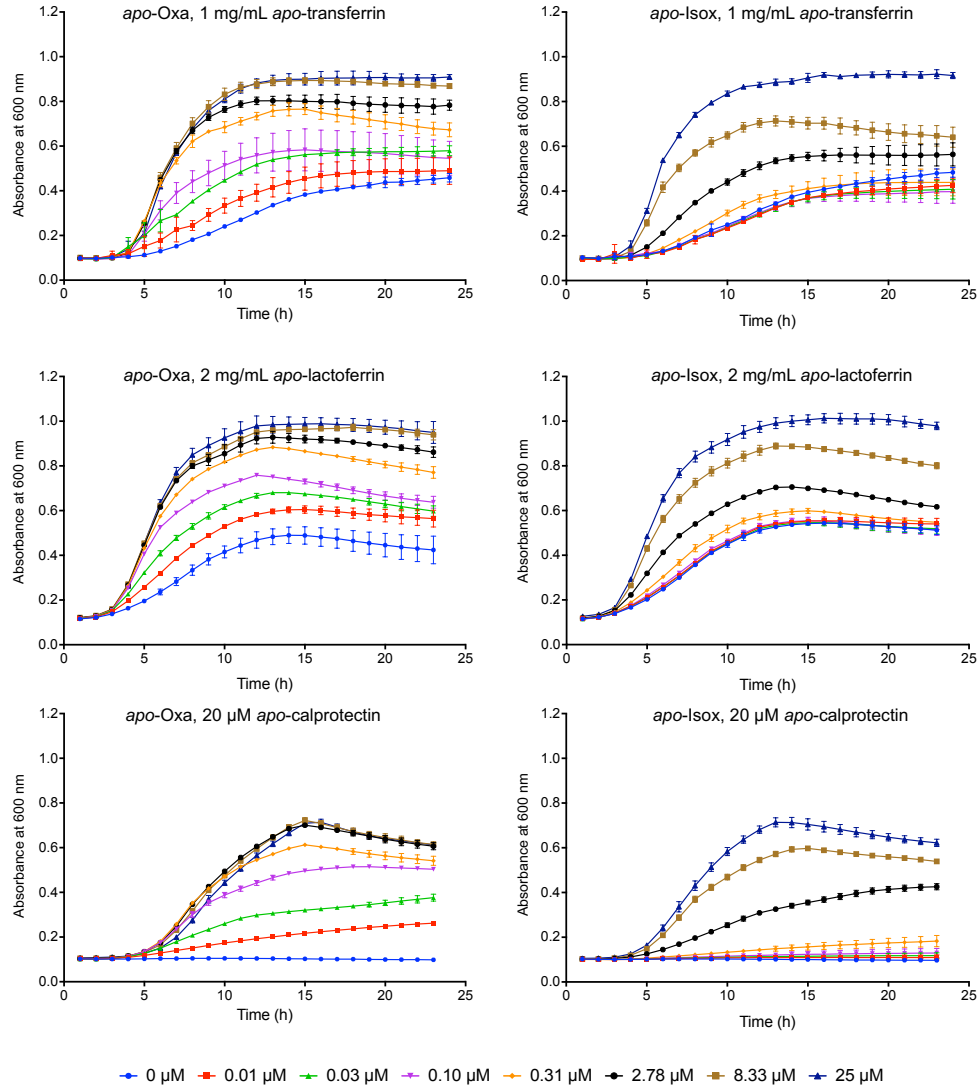

**Fig S6. Growth curves of the *A. baumannii*  $\Delta$ *basD* treated with either *apo*-Oxa or *apo*-Isox under iron-deficient conditions created by supplementation of the human metal sequestering proteins.**

All experiments were conducted using the LB media containing 1 mg/mL *apo*-transferrin, 2 mg/mL *apo*-lactoferrin, or 20  $\mu$ M *apo*-calprotectin. Error bars represent the standard deviations of independent triplicate experiments.
