# Supplementary material for: Distinctive Roles of Two Acinetobactin Isomers in Challenging Host Nutritional Immunity
Source: PubMed Central journal article supplement (PMC8546848; doi:10.1128/mbio.02248-21), 2021-09-14
Supplement: mbio.02248-21-sf007.pdf [file mbio.02248-21-sf007.pdf]

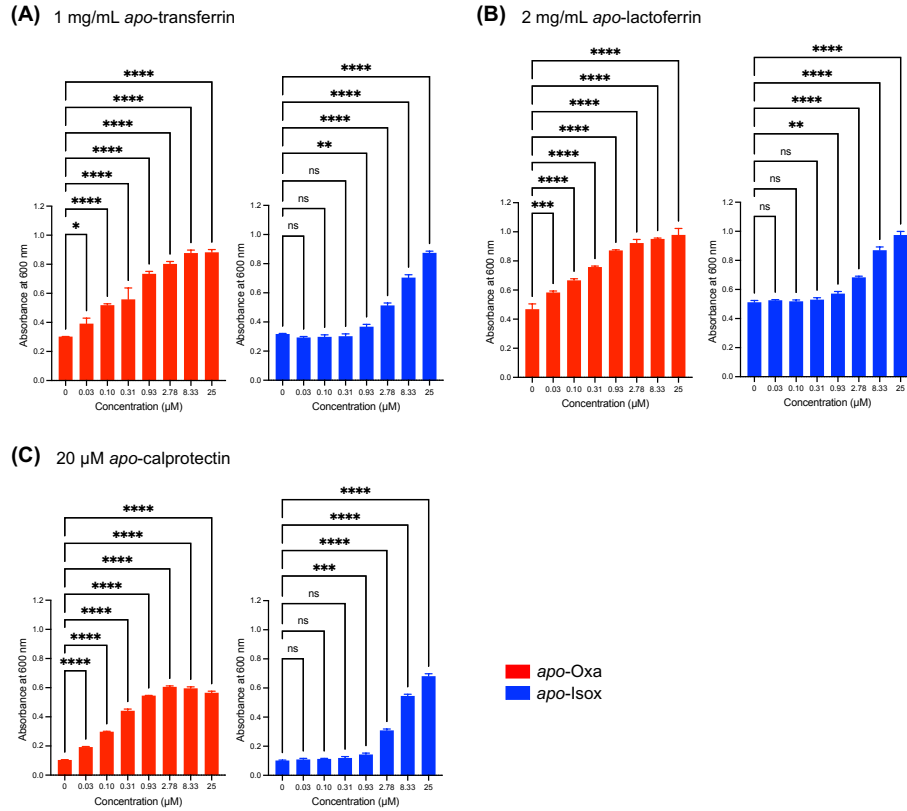

**Fig S7. Statistical analysis on the growth promoting activity of acinetobactins under the iron-deficient conditions created by metal sequestering proteins.**

The bar graph results are essentially identical to those in Fig. 6. Statistical significance of the growth promoting activity difference between either *apo*-acinetobactin at the indicated concentrations and the DMSO control was assessed by one-way ANOVA tests (ns: not significant, \*:  $p < 0.05$ , \*\*:  $p < 0.01$ , \*\*\*:  $p < 0.001$ , and \*\*\*\*:  $p < 0.0001$ ).
