# Supplementary material for: Distinctive Roles of Two Acinetobactin Isomers in Challenging Host Nutritional Immunity
Source: PubMed Central journal article supplement (PMC8546848; doi:10.1128/mbio.02248-21), 2021-09-14
Supplement: mbio.02248-21-sf008.pdf [file mbio.02248-21-sf008.pdf]

```

17978      mnhnikglsmnsvsynrnfktgndqrinhsvflngvasaqmalrlgylgvtvflcasn 60
19606      mnqnikglsmnsvsynrnfktgndqrinhsvflngvasaqmalrlgylgvtvflcasn 60
AC12       mnqnikglsmnsvsynrnfktgndqrinhsvflngvasaqialrlgylgvtvflcasn 60
          *****

17978      tyaavidnsaktleqqtaqtnvaalpaitvkaeqddtyaggqvsskssvflgntkmet 120
19606      tyaavidnstktleqqtaqtnvaalpaitvkaeqddtyaggqvatsnsvflgskkfldt 120
AC12       tyaavidnsaktleqqtaqtnvaalpaitvkaeqddtyaggqvsskssvflgntkmet 120
          *****

17978      pfntiaytekyiadqqakditdviaktgpsifstgaygiaesyaairfrsssvaaagrdt 180
19606      pfntisytdkyiedkqakditeviaatdpsiytngasggwsenyiirgyasst----ndm 176
AC12       pfntiaytdtyiadkqakditsviaktgpsvftnaasggwsenyiirgfessp----sdm 176
          *****

17978      smgglgyiaplyraspemferidvlgkpsamlngmmpgstlgtvnlvpkragddpltrf 240
19606      smnglfgitpfyrtspemfgrvevlgkpsallngmmpagsvggtvnlvtkyaaedpfarl 236
AC12       smnglfgitpyrtpemfekinvlkpsallngmmpptsgigtvdlttkratdepltrl 236
          *****

17978      tttymdsqfghldigrffgenkefgvrfnsvyrdgegpikqekthlflslgldwrgd 300
19606      tttymdaqfghvdvgrffgenkefgvringmyrdgdaavndqskesrlflslgldwqge 296
AC12       tttymdsqfghldvgrffgsdkefgvranavyrdsgpvekqdlkelfslgmdwhgd 296
          *****

17978      narlsadlytsrdhadginrgltilpgvnlpkapnptllnptwtvntnrdtggmirgey 360
19606      narvfvdaydalhdvgtvrgvntavgiqppkadtllspdwgsvetkdkgamirgey 356
AC12       rarvstdlytskdrvdgvtvrginlgkiaipkpppetllnpdwsfvdidqkgamirgey 356
          *****

17978      dlndkwmayatagmskteyntlgaakteiqneagdikfniahlgfkyerksaevglrgkf 420
19606      dlfsqlmayayqsttekyngasagtitstgtlsslqqlafdvdkksadagfkgkf 416
AC12       dltnnmgyatyqgsktekyngamsatvldntgtfqtsglqtfvndkksadavglkgkf 416
          *****

17978      dtgavkhalalnalnathyretdeagirqgfppeg-drvtniyn--pnwgskpnrviapifs 477
19606      etgsvkhqwanatyntqdddygyriipgfsdpvitniydpnpwgpkeftpp-flfh 475
AC12       ntgavhgwvwanatyqkhnqddyvrvnvaeg--wtnlyd--piwgkavpfnap-lisn 471
          *****

17978      nkenltsvgladtmsvlqdvqlltllgryqnipteslngqgvrringrydknaitpaaai 537
19606      stltsstsfgladtlsfaqdkvqlltllgrrhqvkatss-----vntlpenaksattpgval 530
AC12       selqlnsygladtlsfiedrltllgvryqvevsnlfv--ptstltykknattpgaaai 529
          *****

17978      lvkandhvslyanyieglssggtvptgqnyenegqifspfkktkmetgikidsnftntf 597
19606      likatdkisvyanyiegltkgdqapat--asnpeifppqktkqqlgkvdltgftahtl 588
AC12       lfkatdkvisyanyiegltkgdaapl--aanypitifapyktkqtefgvkdqgftahtl 587
          *****

17978      svfqikrsnyvikstdekiksiygadqeqrnrngvewgfygspvndirvmggltyidpki 657
19606      safeitkpslylpsklvnnlptfvsdqeqrnrngiewsfsgpiehvrimggftyldepel 648
AC12       slfeikkpsaytdlvt-----niytsggeqrnrngiewsfsgspievrlimggasyiepev 642
          *****

17978      tktriaseelnvavgvpkvqaklgiegdvsiyigp--lrltanataaskqiyndnstsvpg 716
19606      tktksggndghtavavpknqaklgaewdtqvaqgtllsgninavskqiyinaentlsvpg 708
AC12       ktaiqsnegnmavgvpkqgklgvewdnevaqgvltlssnatavskqiyidqentlhipg 702
          *****

17978      revyigaryntkiaqfpvtirgnidnltnksywsmpqftnlmlgaprtyllsatidf 774
19606      rttldvgarystkvdehpvtfraniynltnkaywaqqltnlalgaprtymlsvsydf 766
AC12       rttldvgaryktsisnhpitfkadinnltnkaywmpklsnlalgaprtymlsvsydf 760
          *****

```

| % identity | ATCC 17978 | ATCC 19606 | AC12   |
|------------|------------|------------|--------|
| ATCC 17978 | 100.00     | 59.84      | 61.92  |
| ATCC 19606 | 59.84      | 100.00     | 70.28  |
| AC12       | 61.92      | 70.28      | 100.00 |

**Fig S8. Sequence comparison among three *A. baumannii* BauA variants.**

The sequences of three BauA variants from *A. baumannii* ATCC 17978, ATCC 19606, and AC12 were aligned using Clustal Omega, and the calculated identity matrix was shown as a table.
