# Supplementary material for: Distinctive Roles of Two Acinetobactin Isomers in Challenging Host Nutritional Immunity
Source: PubMed Central journal article supplement (PMC8546848; doi:10.1128/mbio.02248-21), 2021-09-14
Supplement: mbio.02248-21-st001.pdf [file mbio.02248-21-st001.pdf]

| Strain or plasmid                 | Relevant characteristic(s) <sup>a</sup>                                                                                                                                         | Reference or source   |
|-----------------------------------|---------------------------------------------------------------------------------------------------------------------------------------------------------------------------------|-----------------------|
| Bacterial strains                 |                                                                                                                                                                                 |                       |
| <i>A. baumannii</i>               |                                                                                                                                                                                 |                       |
| ATCC 19606 <sup>T</sup>           | Type strain                                                                                                                                                                     |                       |
| HKD01                             | ATCC 19606 <sup>T</sup> with $\Delta basD$                                                                                                                                      | Ref. (1)              |
| HKD02                             | ATCC 19606 <sup>T</sup> with $\Delta bauA$                                                                                                                                      | Ref. (1)              |
| OH747                             | ATCC 19606 <sup>T</sup> with $\Delta bauB$                                                                                                                                      | This study            |
| OH764                             | ATCC 19606 <sup>T</sup> with $\Delta bauD$                                                                                                                                      | This study            |
| OH766                             | ATCC 19606 <sup>T</sup> with $\Delta bauF$                                                                                                                                      | This study            |
| OH1208                            | HKD01 with $\Delta bauA$                                                                                                                                                        | This study            |
| OH1040                            | <i>basD</i> <sup>+</sup> rescue in HKD01                                                                                                                                        | This study            |
| OH1046                            | <i>bauA</i> <sup>+</sup> rescue in HKD02                                                                                                                                        | This study            |
| OH1055                            | <i>bauB</i> <sup>+</sup> rescue in OH747                                                                                                                                        | This study            |
| OH1060                            | <i>bauD</i> <sup>+</sup> rescue in OH764                                                                                                                                        | This study            |
| <i>E. coli</i>                    |                                                                                                                                                                                 |                       |
| DH5 $\alpha$ $\lambda$ <i>pir</i> | <i>supE44</i> $\Delta lacU169(\phi 80 lacZ\Delta M15) hsdR17 recA1 endA1 gy-rA96 thi-1 relA1 \lambda pir$ (phage lysogen); plasmid replication                                  | Laboratory collection |
| S17-1 $\lambda$ <i>pir</i>        | <i>\lambda pir</i> lysogen; <i>thi pro hsdR hsdM<sup>r</sup> recA</i> RP4-2 Tc::Mu-Km::Tn7; T <sup>r</sup> Sm <sup>r</sup> ; host for $\pi$ -requiring plasmids; conjugal donor | Ref. (2)              |
| Plasmid                           |                                                                                                                                                                                 |                       |
| pUC4K                             | pUC4 with <i>nptI</i> ; Ap <sup>r</sup> , Km <sup>r</sup>                                                                                                                       | Pharmacia             |
| pHKD01                            | pDS132, multicloning sites; <i>oriR6K sacB</i> ; Cm <sup>r</sup>                                                                                                                | Ref. (1)              |
| pSE380                            | trc promoter expression vector; high copy number, IPTG inducible; Ap <sup>r</sup>                                                                                               | Ref. (3)              |
| pOH703                            | pHKD01 with $\Delta bauB::nptI$ ; Cm <sup>r</sup> , Km <sup>r</sup>                                                                                                             | This study            |
| pOH710                            | pHKD01 with $\Delta bauD::nptI$ ; Cm <sup>r</sup> , Km <sup>r</sup>                                                                                                             | This study            |
| pOH711                            | pHKD01 with $\Delta bauF::nptI$ ; Cm <sup>r</sup> , Km <sup>r</sup>                                                                                                             | This study            |
| pOH1037                           | pHKD01 with <i>basD</i> coding region of <i>A. baumannii</i> ATCC19606 under control of its native promoter with <i>nptI</i> ; Km <sup>r</sup>                                  | This study            |
| pOH1041                           | pHKD01 with <i>bauA</i> coding region of <i>A. baumannii</i> ATCC19606 under control of its native promoter with <i>nptI</i> ; Km <sup>r</sup>                                  | This study            |
| pOH1051                           | pHKD01 with <i>bauB</i> coding region of <i>A. baumannii</i> ATCC19606 under control of its native promoter with <i>nptI</i> ; Km <sup>r</sup>                                  | This study            |
| pOH1053                           | pHKD01 with <i>bauD</i> coding region of <i>A. baumannii</i> ATCC19606 under control of its native promoter with <i>nptI</i> ; Km <sup>r</sup>                                  | This study            |

<sup>a</sup>Tp<sup>r</sup>, trimethoprim-resistant; Sm<sup>r</sup>, streptomycin-resistant; Ap<sup>r</sup>, ampicillin-resistant; Km<sup>r</sup>, kanamycin-resistant; Cm<sup>r</sup>, chloramphenicol-resistant.

References: (1) Appl Environ Microb (2015) 81:3357–3368. (2) Nat Biotechnol (1983) 1: 784–791. (3) Nucleic Acids Res (1991) 19: 4479–4484.

**Table S1. Bacterial strains and plasmids used in this study.**
