# Supplementary material for: Distinctive Roles of Two Acinetobactin Isomers in Challenging Host Nutritional Immunity
Source: PubMed Central journal article supplement (PMC8546848; doi:10.1128/mbio.02248-21), 2021-09-14
Supplement: mbio.02248-21-st002.pdf [file mbio.02248-21-st002.pdf]

| Primers <sup>a</sup>                                         | Oligonucleotide sequence (5'→3') <sup>b,c</sup>                            | Use                                                                                |
|--------------------------------------------------------------|----------------------------------------------------------------------------|------------------------------------------------------------------------------------|
| Gene deletion in <i>A. baumannii</i> ATCC 19606 <sup>T</sup> |                                                                            |                                                                                    |
| BauB01F                                                      | AGTTTCTATTTAGCCCTGATCGC                                                    | Amplification of upstream region of <i>bauB</i>                                    |
| BauB01R                                                      | <u>TAACTAAGTGATGTGCCAAAAATATGTATTCAAGCTCCAGATGAGTTG</u>                    |                                                                                    |
| BauB02F                                                      | ATTTTGGGCACATCACTTAGTTAA                                                   | Amplification of downstream region of <i>bauB</i>                                  |
| BauB02R                                                      | <u>GCAACACCTTCTTCACGAGGCAGACGCCATCAACATGATCTAAGGCA</u>                     |                                                                                    |
| BauD01F                                                      | TTTCTGTCAGCACCAATGGC                                                       | Amplification of upstream region of <i>bauD</i>                                    |
| BauD01R                                                      | <u>TCATCCATAGCTTTGTAATACGCATCAAATCGCATCAGTGGCG</u>                         |                                                                                    |
| BauD02F                                                      | ATGCGTATTACAAAGCTATGGATG                                                   | Amplification of downstream region of <i>bauD</i>                                  |
| BauD02R                                                      | <u>GCAACACCTTCTTCACGAGGCAGACCATTGGACCAATGAGTGACG</u>                       |                                                                                    |
| BauF01F                                                      | ATATATAACCCAAGCTTAATGATTACTATAGAG                                          | Amplification of upstream region of <i>bauF</i>                                    |
| BauF01R                                                      | <u>GCAACACCTTCTTCACGAGGCAGACCCGACATATCATGATGAAACGG</u>                     |                                                                                    |
| BauF02F                                                      | AAGTGCATTCATGGCACCA                                                        | Amplification of downstream region of <i>bauF</i>                                  |
| BauF02R                                                      | <u>TAATCATTAAAGCTTGGGTTATATAATTAAGTTTCTTTTACATACAAA-TAGGCAC</u>            |                                                                                    |
| Single copy complementation in <i>A. baumannii</i> mutants   |                                                                            |                                                                                    |
| C-BauDCEBAF                                                  | <u>GGCCTTTTGGCGTTTCTACAAACTCAAATGAATCCTGGTTTATCAAATGG</u>                  | Amplification of <i>P<sub>bauDCEBA</sub></i>                                       |
| C-BauDCEBAR                                                  | CAGTGGCGTGCCCCACT                                                          |                                                                                    |
| C-BauAF                                                      | <u>CAGTGGCGTGCCCCACTTGAGCG-</u><br><u>TAATGAATCAAAACATTAAGGCTTTCA</u>      | Amplification of <i>bauA</i> ORF                                                   |
| C-BauAR                                                      | <u>TGCCGCCAGGCAAATCTGTTTTATAATGAATATCATAAAAAACCCGC</u>                     |                                                                                    |
| C-BauBF                                                      | <u>CAGTGGCGTGCCCCACTTGAGCGTAATGAACTGGAAGAAAAAGTATGGG</u>                   | Amplification of <i>bauB</i> ORF                                                   |
| C-BauBR                                                      | <u>TGCCGCCAGGCAAATCTGTTTTATTTTTATTAAC-</u><br><u>TATCTGCTTAAAATTCATAGC</u> |                                                                                    |
| C-BauDF                                                      | <u>GGCCTTTTGGCGTTTCACAAACTCAAATGAATCCTGGTTTATCAAATGG</u>                   | Amplification of <i>bauD</i> ORF with its native promoter                          |
| C-BauDR                                                      | <u>TGCCGCCAGGCAAATCTGTTTTATTTATCTGAACTCCCTCAAATGAGG</u>                    |                                                                                    |
| C-BasDF                                                      | <u>GGCCTTTTGGCGTTTC-</u><br><u>TACAAACTCGTTTATACTTTATCTGTTTCCAAAATGATG</u> | Amplification of <i>basD</i> ORF with its native promoter                          |
| C-BasDR                                                      | <u>TGCCGCCAGGCAAATCTGTTTTATGACATTCTAAA-</u><br><u>TATCAATTTAATTTAATGGT</u> |                                                                                    |
| Amplification of kanamycin-resistance cassette               |                                                                            |                                                                                    |
| U1                                                           | GTCTGCCTCGTGAAGAAGGTG                                                      | Amplification of <i>nptI</i>                                                       |
| U2                                                           | GATCCGTCGACCTGCAGG                                                         |                                                                                    |
| Amplification of <i>rrmB</i> terminator                      |                                                                            |                                                                                    |
| R1                                                           | <u>TCATCTGAGCAATGAGCAACCTTCCATAAAACAGAATTTGCCTGGCG</u>                     | Amplification of <i>rrmB</i> terminator                                            |
| R2                                                           | <u>ACGACGACGCCGTGTGTTTGTATCGAGTTTGTAGAACGCAAAAAGGC</u>                     |                                                                                    |
| Amplification of intergenic regions                          |                                                                            |                                                                                    |
| Int01F                                                       | CCTTGATAGGACACCAGTAGAAAGAC                                                 | Amplification of intergenic region I located between DJ41_RS05115 and DJ41RS05120  |
| Int01R                                                       | GGAAGGTTGCTCATTGCTCAG                                                      |                                                                                    |
| Int02F                                                       | GATAACAAACACACGGCGTCG                                                      | Amplification of intergenic region II located between DJ41_RS05115 and DJ41RS05120 |
| Int02R                                                       | <u>GCAACACCTTCTTCACGAGGCAGACTCCTCATCGCGTAGATGATTTAG</u>                    |                                                                                    |

<sup>a</sup>The primers were designed using the genomic sequences of *A. baumannii* ATCC 19606 (GenBank accession number ACQB00000000).

<sup>b</sup>Regions of oligonucleotides that are not complementary to the corresponding templates are underlined.

<sup>c</sup>Regions of oligonucleotides that are subjected to restriction enzymes are underlined and italicized.

**Table S2. Oligonucleotides used in this study.**
